# Supplementary material for: The Impact of Hempseed Consumption on Bone Parameters and Body Composition in Growing Female C57BL/6 Mice
Source: MDPI journal article supplement (doi:10.3390/ijerph19105839), 2022-05-11
Supplement: s1 [file s1]

**Supplementary Table S1. Nutrition information for hempseed**

|                        |      |
|------------------------|------|
| Amount per 100 g       |      |
| Kilocalories           | 550  |
| Total fat, g           | 36   |
| Polyunsaturated fat, g | 27   |
| Omega-6 fat, g         | 20   |
| Omega-3 fat, g         | 7    |
| Monounsaturated fat, g | 4    |
| Saturated fat, g       | 3    |
| Carbohydrate, g        | 31   |
| Dietary fiber, g       | 29   |
| Soluble fiber, g       | 2    |
| Insoluble fiber, g     | 27   |
| Protein, g             | 26   |
| Sodium, mg             | 0    |
| Potassium, mg          | 760  |
| Calcium, mg            | 110  |
| Iron, mg               | 13   |
| Vitamin E, mg          | 2.2  |
| Thiamin, mg            | 0.6  |
| Riboflavin, mg         | 0.3  |
| Niacin, mg             | 4    |
| Vitamin B6, mg         | 0.7  |
| Folate, mg             | 0.16 |
| Phosphorus, mg         | 960  |
| Magnesium, mg          | 430  |
| Zinc, mg               | 6.7  |
| Copper, mg             | 1.7  |
| Manganese, mg          | 12   |

Information provided by Natura™ for CHII whole toasted hempseed;  
<https://natera.ca/product-category/chii-hemp/> (accessed on 7 May 2022)
